# Supplementary material
Source: PubMed Central journal article supplement (PMC4875217)
Supplement: 13238_2012_2002_MOESM1_ESM.pdf [file 13238_2012_2002_MOESM1_ESM.pdf]

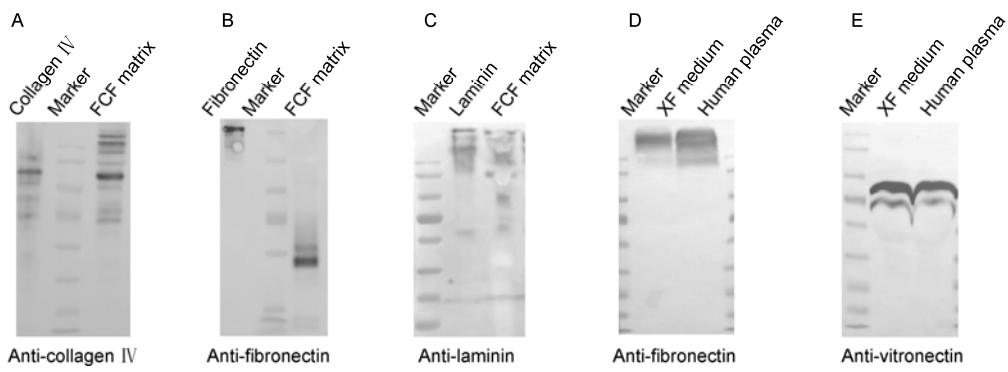

**Figure S1. ECM protein composition of FCF matrix and XF medium.**

Western blotting was performed on FCF matrix using antibodies against Collagen IV (A), fibronectin (B) and laminin (C). Western blots of XF medium were probed with antibodies against fibronectin (D) and vitronectin (E). Collagen IV, fibronectin and laminin are purified proteins purchased from Sigma.

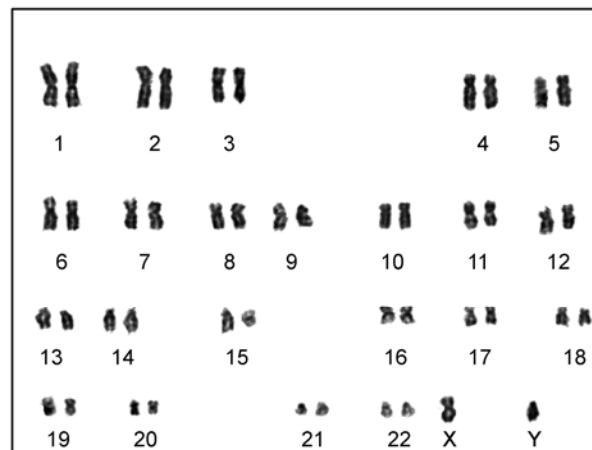

**Figure S2. G-banding analysis of the hiPSCs generated.** G-banding analysis confirmed that C1-OSN hiPSCs had a normal karyotype.

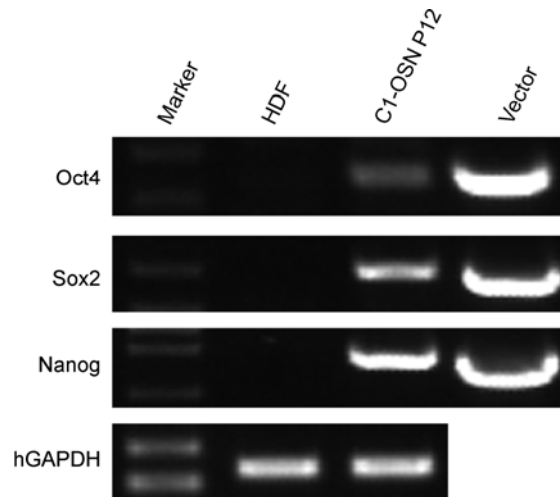

**Figure S3. Confirmation of the integration of exogenous genes in C1-OSN hiPSCs.** Genomic DNA was extracted and amplified with primers for lentiviral Oct4, Sox2 and Nanog.

**Table S1** STR profiles of H7 hESCs, parental HDFs and C1-OSN hiPSCs

| Locus   | HDF      | hiPSCs   | H7       |
|---------|----------|----------|----------|
| Amel    | X, Y     | X, Y     | X, X     |
| D3S1358 | 15, 18   | 15, 18   | 15, 16   |
| D13S317 | 8, 9     | 8, 9     | 11, 12   |
| D7S820  | 11, 11   | 11, 11   | 10, 11   |
| D16S539 | 9, 9     | 9, 9     | 12, 13   |
| Penta E | 15, 20   | 15, 20   | 11, 13   |
| TPOX    | 8, 8     | 8, 8     | 8, 11    |
| TH01    | 6, 9     | 6, 9     | 6, 6     |
| D2S1338 | 19, 23   | 19, 23   | 20, 24   |
| CSF1PO  | 9, 10    | 9, 10    | 12, 12   |
| D19S433 | 13.2, 14 | 13.2, 14 | 13, 14.2 |
| vWA     | 14, 17   | 14, 17   | 14, 15   |
| D5S818  | 10, 12   | 10, 12   | 11, 13   |
| FGA     | 22, 25   | 22, 25   | 21, 22   |
| D6S1043 | 13, 14   | 13, 14   | 18, 18   |
| D8S1179 | 15, 15   | 15, 15   | 13, 14   |
| D21S11  | 29, 30   | 29, 30   | 30, 31.2 |
| D18S51  | 14, 19   | 14, 19   | 12, 15   |

**Table S2** Supplements for XF medium

| Trace elements                                                                      | ng/L     |
|-------------------------------------------------------------------------------------|----------|
| AgNO <sub>3</sub>                                                                   | 1.80E-04 |
| AlCl <sub>3</sub> · 6H <sub>2</sub> O                                               | 1.20E-03 |
| (CH <sub>3</sub> COO) <sub>2</sub> Ba                                               | 2.00E-03 |
| CdSO <sub>4</sub> · 2.67H <sub>2</sub> O                                            | 1.16E-02 |
| CoCl <sub>2</sub> · 6H <sub>2</sub> O                                               | 2.00E-03 |
| Cr <sub>2</sub> (SO <sub>4</sub> ) <sub>3</sub> · xH <sub>2</sub> O                 | 6.00E-04 |
| GeO <sub>2</sub>                                                                    | 6.00E-04 |
| Na <sub>2</sub> SeO <sub>3</sub>                                                    | 1.40E-03 |
| H <sub>2</sub> SeO <sub>3</sub>                                                     | 4.00E-03 |
| KBr                                                                                 | 1.20E-04 |
| KI                                                                                  | 1.80E-04 |
| MnCl <sub>2</sub> · 4H <sub>2</sub> O                                               | 4.00E-04 |
| NaF                                                                                 | 4.00E-03 |
| Na <sub>2</sub> SiO <sub>3</sub>                                                    | 8.60E-02 |
| NaVO <sub>3</sub>                                                                   | 1.20E-03 |
| (NH <sub>4</sub> ) <sub>6</sub> Mo <sub>7</sub> O <sub>24</sub> · 4H <sub>2</sub> O | 1.20E-02 |
| NiSO <sub>4</sub> · 6H <sub>2</sub> O                                               | 2.00E-04 |
| RbCl                                                                                | 1.40E-03 |
| SnCl <sub>2</sub>                                                                   | 6.00E-05 |
| ZrOCl <sub>2</sub> · xH <sub>2</sub> O                                              | 4.00E-03 |
| Amino acids                                                                         | mg/L     |
| Glycine                                                                             | 3.00E+01 |
| L-Histidine                                                                         | 1.88E+02 |
| L-Isoleucine                                                                        | 6.80E+02 |
| L-Methionine                                                                        | 1.80E+01 |
| L-Phenylalanine                                                                     | 3.60E+02 |
| L-Proline                                                                           | 8.00E+02 |
| L-Hydroxyproline                                                                    | 2.00E+01 |
| L-Serine                                                                            | 1.60E+02 |
| L-Threonine                                                                         | 4.40E+02 |
| L-Tryptophan                                                                        | 8.80E+01 |
| L-Tyrosine                                                                          | 1.54E+01 |
| L-Valine                                                                            | 4.80E+02 |
| Other components                                                                    | mg/L     |
| Thiamine                                                                            | 3.00E-01 |
| Reduced glutathione                                                                 | 1.88E+00 |
| L-Ascorbic acid-2-phosphate                                                         |          |
| magnesium                                                                           | 6.80E+00 |
| Sodium selenium                                                                     | 1.40E-02 |
| insulin                                                                             | 2.00E+01 |

|                                      |          |
|--------------------------------------|----------|
| Holo-transferrin                     | 1.10E+01 |
| L-glutamine                          | 1.46E-01 |
| bFGF                                 | 1.00E-01 |
| TGF $\beta$ 1                        | 6.00E-04 |
| LiCl                                 | 4.24E+01 |
| NaCl sedimentation plasma<br>extract | 1.66E+04 |

**Table S3** Primers used for PCR, RT-PCR and quantitative RT-PCR

| Primers                          |   | Sequences (5' to 3')      | Size (bp) |
|----------------------------------|---|---------------------------|-----------|
| For qRT-PCR                      |   |                           |           |
| Oct4 (Yang et al., 2008)         | F | AACCTGGAGTTTGTGCCAGGGTTT  | 123       |
|                                  | R | TGAACTTCACCTTCCCTCCAACCA  |           |
| Sox2 (Park et al., 2008)         | F | AGCTACAGCATGATGCAGGA      | 126       |
|                                  | R | GGTCATGGAGTTGTACTGCA      |           |
| Nanog (self-designed)            | F | CCTATGCCTGTGATTTGTGGG     | 165       |
|                                  | R | AGTGGGTTGTTTGCCTTTGG      |           |
| GAPDH (Zhang et al., 2011)       | F | GAAATCCCATCACCATCTTCCAGG  | 120       |
|                                  | R | GAGCCCCAGCCTTCTCCATG      |           |
| For RT-PCR                       |   |                           |           |
| hCG- $\beta$ (Liu et al., 2006)  | F | CCCAGCATCCTATCACCTCC      | 216       |
|                                  | R | AGCCCTCCTTCTCCACAGC       |           |
| NFH (Liu et al., 2006)           | F | TGAACACAGACGCTATGCGCTCAG  | 400       |
|                                  | R | CACCTTTATGTGAGTGGACACAGAG |           |
| Pax6 (Liu et al., 2006)          | F | TCAGGCTTCGCTAATGGG        | 269       |
|                                  | R | AAAAGGCCTCACACATCTG       |           |
| Thy1 (Liu et al., 2006)          | F | CATGAGAATACCAGCAGTTCACCCA | 272       |
|                                  | R | CACTTGACCAGTTTGTCTCTGAGCA |           |
| Cardiac-actin (Liu et al., 2006) | F | TCTATGAGGGCTACGCTTTG      | 630       |
|                                  | R | CCTGACTGGAAGGTAGATGG      |           |
| AFP (Liu et al., 2006)           | F | AGAACCTGTCACAAGCTGTG      | 680       |
|                                  | R | GACAGCAAGCTGAGGATGTC      |           |
| GAPDH (Liu et al.,               | F | AATCCCATCACCATCTTCC       | 382       |

|                              |         |                               |     |
|------------------------------|---------|-------------------------------|-----|
| 2006)                        | R       | CATCACGCCACAGTTTCC            |     |
| Oct4 (Liu et al., 2006)      | F       | ATTCAGCCAAACGACCAT            | 388 |
|                              | R       | CCCTGAGAAAGGAGACCC            |     |
| Sox2 (Liu et al., 2006)      | F       | CCCCCGGCGGCAATAGCA            | 488 |
|                              | R       | TCGGCGCCGGGGAGATACA           |     |
| Nanog                        | F       | TGCCTCACACGGAGACTG            | 353 |
|                              | R       | GCTATTCTTCGGCCAGTT            |     |
| For provirus integration PCR |         |                               |     |
| Oct4 (Yu et al., 2007)       | F       | CAGTGCCCGAAACCCACAC           | 656 |
| Nanog (Yu et al., 2007)      | F       | CAGAAGGCCTCAGCACCTAC          | 732 |
| Sox2 (Yu et al., 2007)       | F       | TACCTCTTCCTCCCCTCCA           | 467 |
| SP3 (Yu et al., 2007)        | R       | AGAGGAACTGCTTCCTTCACGACA      |     |
| For bisulfite-sequencing PCR |         |                               |     |
| mOct4 (Li et al., 2011)      | meth F1 | TTATTGTTATTATTATTAGGTAAATATTT | 336 |
|                              | meth R1 | AAAATCCCCCACACCTCAAACCTAACC   |     |
|                              | meth F2 | GGGGTTAGAGGTTAAGGTTAGTGGGTG   | 282 |
|                              | meth R2 | AAACCTTAAAACTTAACCAAATC       |     |
| mNanog (Li et al., 2011)     | meth F1 | TGGTTAGGTTGGTTTTAAATTTTTG     | 375 |
|                              | meth F2 | TTAATTTATTGGGATTATAGGGGTG     | 282 |
|                              | meth R  | AACCCACCCTTATAAATTCTCAATTA    |     |

## REFERENCES

- Li, W., Wang, X., Fan, W., Zhao, P., Chan, Y.C., Chen, S., Zhang, S., Guo, X., Zhang, Y., Li, Y., et al. Modeling abnormal early development with induced pluripotent stem cells from aneuploid syndromes. *Hum Mol Genet.* 2011 Sep 23.[ Epub ahead of print].
- Liu, Y., Song, Z., Zhao, Y., Qin, H., Cai, J., Zhang, H., Yu, T., Jiang, S., Wang, G., Ding, M., et al. (2006). A novel chemical-defined medium with bFGF and N2B27 supplements supports undifferentiated growth in human embryonic stem cells. *Biochem Biophys Res Commun* 346, 131–139.
- Park, I.H., Zhao, R., West, J.A., Yabuuchi, A., Huo, H., Ince, T.A., Lerou, P.H., Lensch, M.W., and Daley, G.Q. (2008). Reprogramming of human somatic cells to pluripotency with defined factors. *Nature* 451, 141–146.

Yang, L., Soonpaa, M.H., Adler, E.D., Roepke, T.K., Kattman, S.J., Kennedy, M., Henckaerts, E., Bonham, K., Abbott, G.W., Linden, R.M., et al. (2008).

Human cardiovascular progenitor cells develop from a KDR+ embryonic-stem-cell-derived population. *Nature* 453, 524–528.

Yu, J., Vodyanik, M.A., Smuga-Otto, K., Antosiewicz-Bourget, J., Frane, J.L., Tian, S., Nie, J., Jonsdottir, G.A., Ruotti, V., Stewart, R., et al. (2007). Induced pluripotent stem cell lines derived from human somatic cells. *Science* 318, 1917–1920.

Zhang, Q., Jiang, J., Han, P., Yuan, Q., Zhang, J., Zhang, X., Xu, Y., Cao, H., Meng, Q., Chen, L., et al. (2011). Direct differentiation of atrial and ventricular myocytes from human embryonic stem cells by alternating retinoid signals.

*Cell Res* 21, 579–587.
